# Supplementary material for: 6″-Debromohamacanthin A, a Bis (Indole) Alkaloid, Inhibits Angiogenesis by Targeting the VEGFR2-Mediated PI3K/AKT/mTOR Signaling Pathways
Source: MDPI journal article supplement (doi:10.3390/md11041087), 2013-04-02
Supplement: s2 [file s2]

marinedrugs-11-01087-s001.mol
  corina  04151404363D 1   1.00000     0.00000 
CORINA 3.49 0023  12.04.2013
 26 30  0  0  0  0  0  0  0  0999 V2000
   -0.0168    1.3849    0.0097 C   0  0  0  0  0  0  0  0  0  0  0  0
    0.0021   -0.0041    0.0020 C   0  0  0  0  0  0  0  0  0  0  0  0
    1.1973   -0.6903   -0.0126 C   0  0  0  0  0  0  0  0  0  0  0  0
    2.3976    0.0130   -0.0203 C   0  0  0  0  0  0  0  0  0  0  0  0
    2.3726    1.4194   -0.0129 C   0  0  0  0  0  0  0  0  0  0  0  0
    1.1505    2.0946    0.0023 C   0  0  0  0  0  0  0  0  0  0  0  0
    3.7731    1.8492   -0.0238 C   0  0  0  0  0  0  0  0  0  0  0  0
    4.5248    0.7372   -0.0365 C   0  0  0  0  0  0  0  0  0  0  0  0
    3.7201   -0.3698   -0.0345 N   0  0  0  0  0  0  0  0  0  0  0  0
    4.2747    3.2702   -0.0209 C   0  0  0  0  0  0  0  0  0  0  0  0
    4.1953    3.8385   -1.4360 C   0  0  0  0  0  0  0  0  0  0  0  0
    5.6603    3.2955    0.4528 N   0  0  0  0  0  0  0  0  0  0  0  0
    6.6652    3.0708   -0.4212 C   0  0  0  0  0  0  0  0  0  0  0  0
    6.3296    2.8157   -1.8506 C   0  0  0  0  0  0  0  0  0  0  0  0
    5.1652    3.1774   -2.3078 N   0  0  0  0  0  0  0  0  0  0  0  0
    7.8211    3.0770   -0.0491 O   0  0  0  0  0  0  0  0  0  0  0  0
    7.3064    2.1608   -2.7384 C   0  0  0  0  0  0  0  0  0  0  0  0
    7.1252    1.8417   -4.1655 C   0  0  0  0  0  0  0  0  0  0  0  0
    8.3191    1.2283   -4.5782 C   0  0  0  0  0  0  0  0  0  0  0  0
    8.5571    1.7366   -2.4024 C   0  0  0  0  0  0  0  0  0  0  0  0
    9.1587    1.1798   -3.4847 N   0  0  0  0  0  0  0  0  0  0  0  0
    6.0844    2.0253   -5.0733 C   0  0  0  0  0  0  0  0  0  0  0  0
    6.2330    1.6023   -6.3758 C   0  0  0  0  0  0  0  0  0  0  0  0
    7.4120    0.9956   -6.7848 C   0  0  0  0  0  0  0  0  0  0  0  0
    8.4498    0.8089   -5.8982 C   0  0  0  0  0  0  0  0  0  0  0  0
   -1.6279   -0.9627    0.0124 Br  0  0  0  0  0  0  0  0  0  0  0  0
  1  2  1  0      
  2  3  2  0      
  3  4  1  0      
  4  5  2  0      
  5  6  1  0      
  6  1  2  0      
  7  8  2  0      
  5  7  1  0      
  4  9  1  0      
  8  9  1  0      
 10  7  1  0      
 10 11  1  0      
 10 12  1  0      
 12 13  1  0      
 13 14  1  0      
 14 15  2  0      
 15 11  1  0      
 13 16  2  0      
 17 14  1  0      
 18 19  2  0      
 17 18  1  0      
 17 20  2  0      
 20 21  1  0      
 19 21  1  0      
 18 22  1  0      
 22 23  2  0      
 23 24  1  0      
 24 25  2  0      
 25 19  1  0      
  2 26  1  0      
M  END
$$$$
