# Supplementary material for: 6″-Debromohamacanthin A, a Bis (Indole) Alkaloid, Inhibits Angiogenesis by Targeting the VEGFR2-Mediated PI3K/AKT/mTOR Signaling Pathways
Source: MDPI journal article supplement (doi:10.3390/md11041087), 2013-04-02
Supplement: s3 [file s3]

marinedrugs-11-01087-s001.mol
  ChemDraw03101420502D

 26 30  0  0  0  0  0  0  0  0999 V2000
   -3.6535   -0.8250    0.0000 C   0  0  0  0  0  0  0  0  0  0  0  0
   -3.6535   -1.6500    0.0000 C   0  0  0  0  0  0  0  0  0  0  0  0
   -2.9391   -2.0625    0.0000 C   0  0  0  0  0  0  0  0  0  0  0  0
   -2.2246   -1.6500    0.0000 C   0  0  0  0  0  0  0  0  0  0  0  0
   -2.2246   -0.8250    0.0000 C   0  0  0  0  0  0  0  0  0  0  0  0
   -2.9391   -0.4125    0.0000 C   0  0  0  0  0  0  0  0  0  0  0  0
   -0.9178   -0.8250    0.0000 C   0  0  0  0  0  0  0  0  0  0  0  0
   -0.9178   -1.6500    0.0000 C   0  0  0  0  0  0  0  0  0  0  0  0
   -1.5572   -2.0625    0.0000 N   0  0  0  0  0  0  0  0  0  0  0  0
   -0.4434   -0.4125    0.0000 C   0  0  0  0  0  0  0  0  0  0  0  0
   -0.4434    0.4125    0.0000 C   0  0  0  0  0  0  0  0  0  0  0  0
    0.2710   -0.8250    0.0000 N   0  0  0  0  0  0  0  0  0  0  0  0
    0.9855   -0.4125    0.0000 C   0  0  0  0  0  0  0  0  0  0  0  0
    0.9855    0.4125    0.0000 C   0  0  0  0  0  0  0  0  0  0  0  0
    0.2710    0.8250    0.0000 N   0  0  0  0  0  0  0  0  0  0  0  0
    1.7000   -0.8250    0.0000 O   0  0  0  0  0  0  0  0  0  0  0  0
    1.7000    0.8250    0.0000 C   0  0  0  0  0  0  0  0  0  0  0  0
    2.9391    0.8250    0.0000 C   0  0  0  0  0  0  0  0  0  0  0  0
    2.9391    1.6500    0.0000 C   0  0  0  0  0  0  0  0  0  0  0  0
    1.7000    1.6500    0.0000 C   0  0  0  0  0  0  0  0  0  0  0  0
    2.3203    2.0213    0.0000 N   0  0  0  0  0  0  0  0  0  0  0  0
    3.6535    0.4125    0.0000 C   0  0  0  0  0  0  0  0  0  0  0  0
    4.3680    0.8250    0.0000 C   0  0  0  0  0  0  0  0  0  0  0  0
    4.3680    1.6500    0.0000 C   0  0  0  0  0  0  0  0  0  0  0  0
    3.6535    2.0625    0.0000 C   0  0  0  0  0  0  0  0  0  0  0  0
   -4.3680   -2.0625    0.0000 Br  0  0  0  0  0  0  0  0  0  0  0  0
  1  2  1  0      
  2  3  2  0      
  3  4  1  0      
  4  5  2  0      
  5  6  1  0      
  6  1  2  0      
  7  8  2  0      
  5  7  1  0      
  4  9  1  0      
  8  9  1  0      
 10  7  1  6      
 10 11  1  0      
 10 12  1  0      
 12 13  1  0      
 13 14  1  0      
 14 15  2  0      
 15 11  1  0      
 13 16  2  0      
 17 14  1  0      
 18 19  2  0      
 17 18  1  0      
 17 20  2  0      
 20 21  1  0      
 19 21  1  0      
 18 22  1  0      
 22 23  2  0      
 23 24  1  0      
 24 25  2  0      
 25 19  1  0      
  2 26  1  0      
M  END
